# Supplementary material for: Heat transfer model for deep tissue injury: a step towards an early thermographic diagnostic capability
Source: Springer Nature journal article supplement (doi:10.1186/1746-1596-9-36), 2014-02-20
Supplement: 13000_2013_1097_MOESM5_ESM.pdf [file 13000_2013_1097_MOESM5_ESM.pdf]

**Healthy****Ischemia****Inflammation**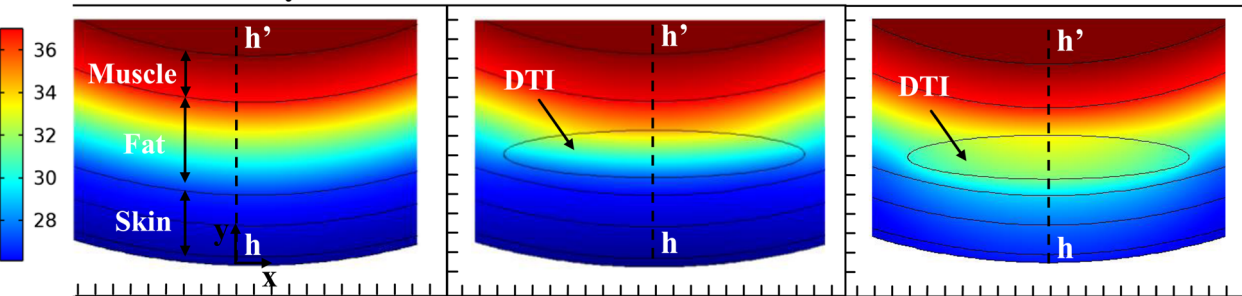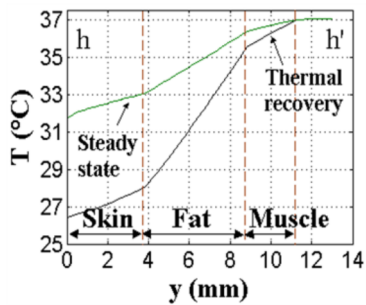**(a)**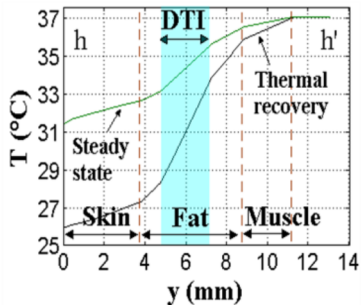**(b)**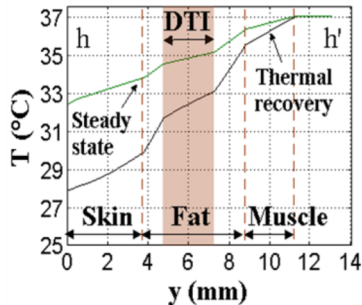**(c)**
