# Supplementary material for: Heat transfer model for deep tissue injury: a step towards an early thermographic diagnostic capability
Source: Springer Nature journal article supplement (doi:10.1186/1746-1596-9-36), 2014-02-20
Supplement: 13000_2013_1097_MOESM10_ESM.pdf [file 13000_2013_1097_MOESM10_ESM.pdf]

## Ischemia

**h=8mm**

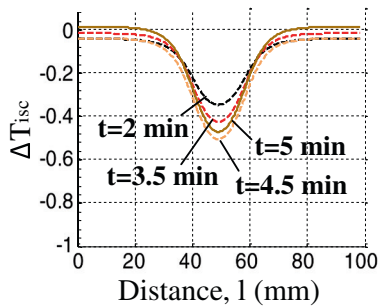

(a)

**h=6mm**

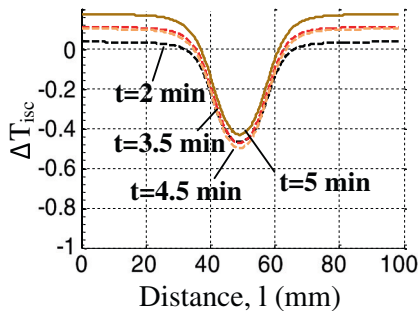

(b)

**h=3.8mm**

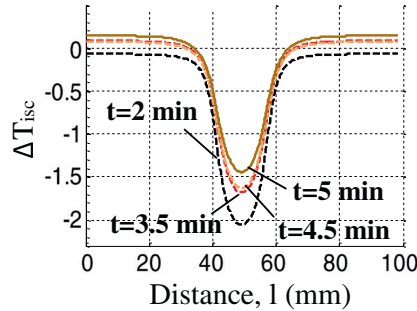

(c)

## Inflammation

**h=8mm**

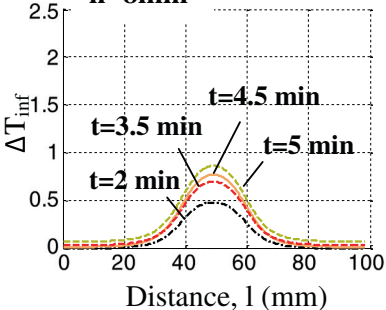

(d)

**h=6mm**

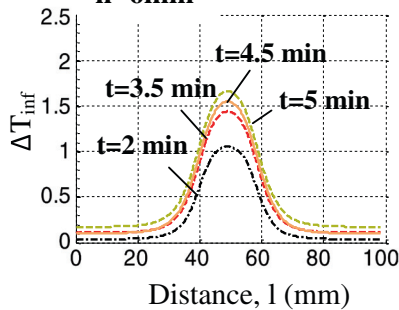

(e)

**h=3.8mm**

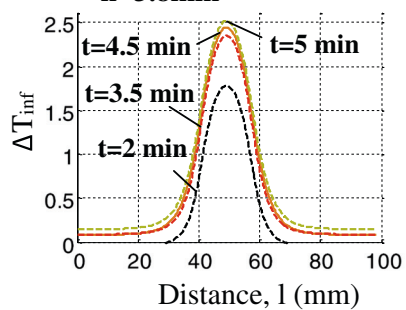

(f)
