# Supplementary material for: Heat transfer model for deep tissue injury: a step towards an early thermographic diagnostic capability
Source: Springer Nature journal article supplement (doi:10.1186/1746-1596-9-36), 2014-02-20

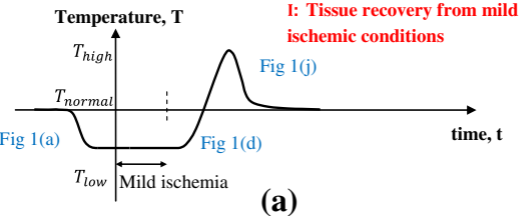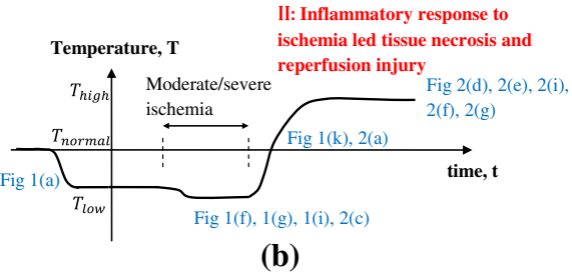

Supplement: 13000_2013_1097_MOESM13_ESM.pdf [file 13000_2013_1097_MOESM13_ESM.pdf]
